# Supplementary material for: Association of Apgar score at five minutes with long-term neurologic disability and cognitive function in a prevalence study of Danish conscripts
Source: PubMed Central journal article supplement (PMC2670812; doi:10.1186/1471-2393-9-14), 2009-04-02
Supplement: 1471-2393-9-14-S1.pdf [file 1471-2393-9-14-S1.pdf]

**Table 3: Association of five-minute Apgar score with neurologic disability and cognitive function.<sup>a</sup>**

| Apgar score at 5 minutes | Any neurologic disability |                                                       | Disqualifying neurologic disability |                                                       | Low cognitive function <sup>b</sup> |                                                       |
|--------------------------|---------------------------|-------------------------------------------------------|-------------------------------------|-------------------------------------------------------|-------------------------------------|-------------------------------------------------------|
|                          | Crude                     | Accounting for perinatal characteristics <sup>c</sup> | Crude                               | Accounting for perinatal characteristics <sup>c</sup> | Crude                               | Accounting for perinatal characteristics <sup>c</sup> |
| <7 vs. 10                | 4.09 (2.36; 7.09)         | 4.02 (2.24; 7.24)                                     | 6.10 (3.41; 10.90)                  | 5.94 (3.19; 11.06)                                    | 1.39 (1.07; 1.81)                   | 1.33 (0.94; 1.88)                                     |
| 7-9 vs. 10               | 1.18 (0.81; 1.71)         | 1.13 (0.77; 1.67)                                     | 1.32 (0.84; 2.08)                   | 1.31 (0.82; 2.07)                                     | 1.09 (0.98; 1.21)                   | 1.08 (0.94; 1.23)                                     |

<sup>a</sup> Entries are prevalence ratios (95% confidence intervals).

<sup>b</sup> Measured for 17 211 men who underwent the draft board evaluation.

<sup>c</sup> Models include 5-minute Apgar score (<7, 7-9, 10); maternal age ( $\leq 20$ , 21-35,  $> 35$  years); marital status (married/unmarried); parity (0,  $\geq 1$ ); breech presentation; gestational age (<37, 37-41,  $\geq 42$  weeks) and small for gestational age (SGA, defined as birth weight <10 percentile of birth weight among male live births for each completed week of gestation).
